# Supplementary material for: Tick Haller’s Organ, a New Paradigm for Arthropod Olfaction: How Ticks Differ from Insects
Source: PubMed Central journal article supplement (PMC5536051; doi:10.3390/ijms18071563), 2017-07-18
Supplement: ijms-18-01563-s001.pdf [file ijms-18-01563-s001.pdf]

# Tick Haller's Organ, a New Paradigm for Arthropod Olfaction: How Ticks Differ from Insects

## Supplementary Materials

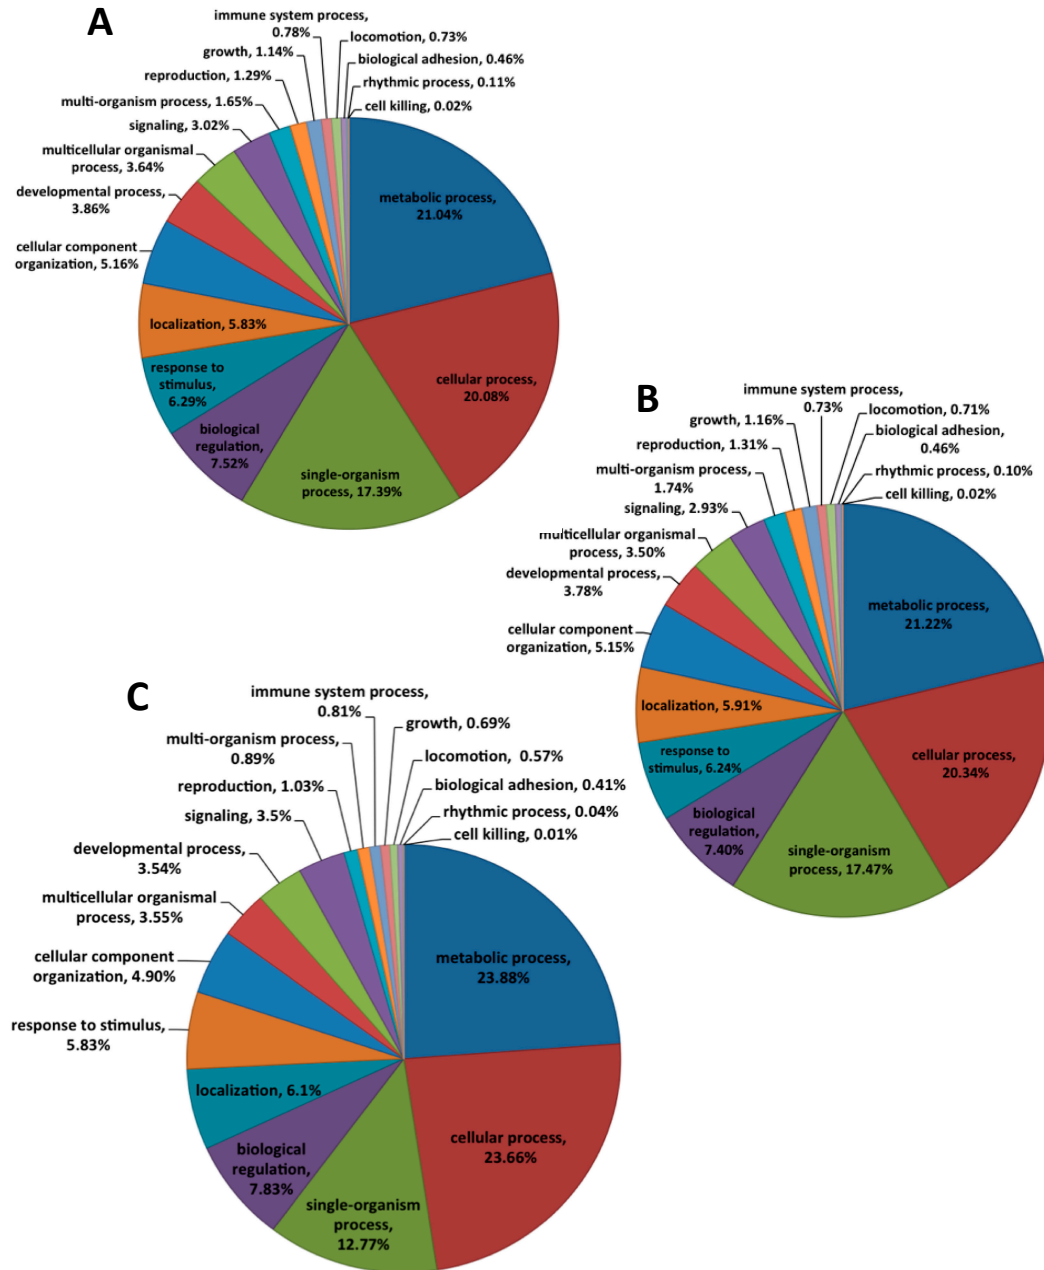

**Figure S1.** Distribution of transcripts annotated at the gene ontology level 2 and their putative involvement in biological functions for **A**, the unfed virgin adult male

*Dermacentor variabilis* illumina 1<sup>st</sup> leg transcriptome; **B**, the unfed virgin adult male *D. variabilis* illumina 4<sup>th</sup> leg transcriptome; **C**, the unfed virgin adult male and female *D. variabilis* 454 1<sup>st</sup> leg transcriptome.

|              |                                                                         |
|--------------|-------------------------------------------------------------------------|
| Contig_73    | MCDDEVAALVVDNGSGMCKAGFAGDDAPRAVFPSIVGRPRHQGVMVGMGQKDSYVGDEAQ            |
| Contig_146   | MCDDEVAALVVDNGSGMCKAGFAGDDAPRAVFPSIVGRPRHQGVMVGMGQKDSYVGDEAQ            |
| RmAAP79880.1 | MCDDEVAALVVDNGSGMCKAGFAGDDAPRAVFPSIVGRPRHQGVMVGMGQKDSYVGDEAQ<br>*****   |
| Contig_73    | SKRGILTLYKPIEHGIVTNWDDMEKIWHHTFYNELRVAPPEEHPVLLTEAPLNPKANREKM           |
| Contig_146   | SKRGILTLYKPIEHGIVTNWDDMEKIWHHTFYNELRVAPPEEHPVLLTEAPLNPKANREKM           |
| RmAAP79880.1 | SKRGILTLYKPIEHGIVTNWDDMEKIWHHTFYNELRVAPPEEHPVLLTEAPLNPKANREKM<br>*****  |
| Contig_73    | TQIMFETFNTPAMYVAIQAVLSLYASGRRTTGIVLDSGDGVSHSTVPIYEGYALPHAILRLD          |
| Contig_146   | TQIMFETFNTPAMYVAIQAVLSLYASGRRTTGIVLDSGDGVSHSTVPIYEGYALPHAILRLD          |
| RmAAP79880.1 | TQIMFETFNTPAMYVAIQAVLSLYASGRRTTGIVLDSGDGVSHSTVPIYEGYALPHAILRLD<br>***** |
| Contig_73    | LAGRDLTDYLMKILTERGYSFTTTAEREIVRDIKEKLCYVALDFEQEMATAASSSSLEKS            |
| Contig_146   | LAGRDLTDYLMKILTERGYSFTTTAEREIVRDIKEKLCYVALDFEQEMATAASSSSLEKS            |
| RmAAP79880.1 | LAGRDLTDYLMKILTERGYSFTTTAEREIVRDIKEKLCYVALDFEQEMATAASSSSLEKS<br>*****   |
| Contig_73    | YELPDGQVITIGNERFRCPEALFQPSFLGMESCGIHETTYNSIMKCDVDIRKDLANTVL             |
| Contig_146   | YELPDGQVITIGNERFRCPEALFQPSFLGMESCGIHETTYNSIMKCDVDIRKDLANTVL             |
| RmAAP79880.1 | YELPDGQVITIGNERFRCPEALFQPSFLGMESCGIHETTYNSIMKCDVDIRKDLANTVL<br>*****    |
| Contig_73    | SGGTTMYPGIADRMQKEITALAPSTMKIKI IAPPERKYSVWIGGSILASLSTFQQMWISK           |
| Contig_146   | SGGTTMYPGIADRMQKEITALAPSTMKIKI IAPPERKYSVWIGGSILASLSTFQQMWISK           |
| RmAAP79880.1 | SGGTTMYPGIADRMQKEITALAPSTMKIKI IAPPERKYSVWIGGSILASLSTFQQMWISK<br>*****  |
| Contig_73    | QEYDESGPSIVHRKCF                                                        |
| Contig_146   | QEYDESGPSIVHRKCF                                                        |
| RmAAP79880.1 | QEYDESGPSIVHRKCF<br>*****                                               |

**Figure S2.** Multiple sequence alignment (Clustal  $\Omega$ ) of the deduced amino acid sequence for actin (contig 73, 1<sup>st</sup> legs; contig 146, 4<sup>th</sup> legs) identified in the top 50 most abundant transcripts of the illumina 1<sup>st</sup> and 4<sup>th</sup> leg transcriptomes of unfed, virgin adult male *Dermacentor variabilis* versus the top GenBank BLAST hit (lowest expect value; Table 1, Table 2). Asterisks (\*) denote conserved residues. The acronym consists of the first letter of genus and species (*Rhipicephalus microplus*, Rm) followed by the GenBank accession number for the protein BLAST hit (AAP79880.1).

```

AaJAT93369.1      LQSLLDHSNKSQANAQKQVQLEVLQADAFKLDENRRLNDLDGSKKMGVENSELQEQ
Contig_86         -----EVQLADAFKLDENRRLNDMDGSKKMGVENSELQEQ
Contig_36         -----AEKQVQLEVLQADAFKLDENRRLNDMDGSKKMGVENSELQEQ
                    *****:*****

AaJAT93369.1      LEEAESQVAQLNKIKASLATQLEEAQRQADEEARERAAILGKYRNLEHDLNRESVEEE
Contig_86         LEEAESQVAQLNKIKASLATQLEEAQRQADEEARERAAILGKYRNLEHDLNRESIEEE
Contig_36         LEEAESQVAQLNKIKASLATQLEEAQRQADEEARERAAILGKYRNLEHDLNRESIEEE
                    *****:*****

AaJAT93369.1      QEAKADFQRQLSKANAEALWRSKYSEGLARLEEEEAQRKLHGKLEAEAEAMEQLNAK
Contig_86         QEAKADFQRQLSKANAEALWRSKYSEGLARLEEEEAQRKLHGKLEAEAEAMEQLNAK
Contig_36         QEAKADFQRQLSKANAEALWRSKYSEGLARLEEEEAQRKLHGKLEAEAEAMEQLNAK
                    *****:*****

AaJAT93369.1      CSGLEKTKAHLQGELEDMSIEVDKANALAASLEKRQKSFQKVAEWKAKVDDLAELDAS
Contig_86         CSGLEKTKAHLQGELEDMSIEVDKANALAASLEKRQKSFQKVAEWKAKVDDLAELDAS
Contig_36         CSGLEKTKAHLQGELEDMSIEVDKANALAASLEKRQKSFQKVAEWKAKVDDLAELDAS
                    *****:*****

AaJAT93369.1      QKECRNSTEVFVKLRAAYEESQEHYEAQVRENKLNQDEIKDLMQDQEGGGRSVHELEKSR
Contig_86         QKECRNSTEVFVKLRAAYEESQEHYEAQVRENKLNQDEIKDLMQDQEGGGRSVHELEKSR
Contig_36         QKECRNSTEVFVKLRAAYEESQEHYEAQVRENKLNQDEIKDLMQDQEGGGRSVHELEKSR
                    *****:*****

AaJAT93369.1      KRLEMEKEELQAALAEAEAALEQEEENKVLRAQLELSQVQRQIDRRIQEKEEFENTRKNH
Contig_86         KRLEMEKEELQAALAEAEAALEQEEENKVLRAQLELSQVQRQIDRRIQEKEEFENTRKNH
Contig_36         KRLEMEKEELQAALAEAEAALEQEEENKVLRAQLELSQVQRQIDRRIQEKEEFENTRKNH
                    *****:*****

AaJAT93369.1      QRALDSMQASLEAEAKGKAEALRLKKKLESDINELEIALDHANKANAEAQKNLKKYQQNV
Contig_86         QRALDSMQASLEAEAKGKAEALRLKKKLESDINELEIALDHANKANAEAQKNLKKYQQNV
Contig_36         QRALDSMQASLEAEAKGKAEALRLKKKLESDINELEIALDHANKANAEAQKNLKKYQQNV
                    *****:*****

AaJAT93369.1      KDLQTALEEEQARDEAREQYASAERRCNALHGELEESRQLLEQSDRARRAGEAELSEM
Contig_86         KDLQTALEEEQARDEAREQYASAERRCNALHGELEESRQLLEQSDRARRAGEAELSEM
Contig_36         KDLQTALEEEQARDEAREQYASAERRCNALHGELEESRQLLEQSDRARRAGEAELSEM
                    *****:*****

AaJAT93369.1      ETVNELSAQTASLSVAKRLEGEAQALQADLDEVLNEAKQSEKAKKAMVDAARLADEL
Contig_86         ETVNELSAQTASLSVAKRLEGEAQALQADLDEVLNEAKQSEKAKKAMVDAARLADEL
Contig_36         ETVNELSAQTASLSVAKRLEGEAQALQADLDEVLNEAKQSEKAKKAMVDAARLADEL
                    *****:*****

AaJAT93369.1      AEQDHALQQEKLKALEQQMKELQVRLDEAEAAALKGGKKI IQKLEQKVRLENELENEQ
Contig_86         AEQDHALQQEKLKALEQQMKELQVRLDEAEAAALKGGKKI IQ-----
Contig_36         AEQDHALQQEKLKALEQQMKELQVRLDEAEAAALKGGKKI IQKLEQKVRLENELENEQ
                    *****:*****

AaJAT93369.1      RRHGDAAKNFRKGERRIKELQFQAEEDRKNHERMQDLVDKQQKIKTYKRQIEEAEETAA
Contig_86         -----KSERRIKELQFQAEEDRKNHERMQDLVDKQQKIKTYKRQIEEAEETAA
Contig_36         RRHGDAAKNFRKSERRIKELQFQAEEDRKNHERMQDLVDKQQKIKTYKRQIEEAEETAA
                    * *****:*****

AaJAT93369.1      LNLAKFRKVVQEELEDAEERADMAENTLAKLRKNRSSASAGRAMSPGLSAPPLRT-
Contig_86         LNLAKFRKVVQEELEDAEERADMAENTLAKLRKNRSSASAGRAMSPGLSAPPLRT
Contig_36         LNLAKFRKVVQEELEDAEERADMAENTLAKLRKNRSSASAGRAMSPGLSAPPLRT
                    *****:*****

```

**Figure S3.** Multiple sequence alignment (Clustal Ω) of the deduced amino acid sequence for myosin (contig 36, 1<sup>st</sup> legs; contig 86, 4<sup>th</sup> legs) identified in the top 50 most abundant transcripts of the illumina 1<sup>st</sup> and 4<sup>th</sup> leg transcriptomes of unfed virgin adult male *Dermacentor variabilis* versus the top GenBank BLAST hit (lowest expect value; Table 1, Table 2). Asterisks (\*) denote conserved residues, colons (:) indicate conservation between groups of strongly similar properties scoring >0.5 in the Gonnet PAM 250 matrix, and periods (.) indicate conservation between groups of weakly similar properties scoring ≤0.5 on the Gonnet PAM 250 matrix. The acronym consists of

the first letter of genus and species (*Amblyomma aureolatum*, Aa) followed by the GenBank accession number for the protein BLAST hit (JAT93369.1).

```

RaJAP88178.1      SPKMTEAEMLMEEKLRKKKKEEEEEMWAEYLEQRKKQRAKEEEELRKLKERQMKRKAQRAE
Contig_22         -----RAE
Contig_42         STKMTEAEMLMEEKLRKKKKEEEEEMWAEYLEQRKKQRAKEEEELRKLKERQAKRKAQRAE
                                     ***

RaJAP88178.1      QEAKLMFEFKKKQEEQRIREMEEKKAREAEAKRRRLEEAERKRQAMLAAKEKREQEPVKPN
Contig_22         QEAKLMFEFKKKQEEQRIRKEMEEKKAREAEAKRRRLEEAERKRQAMLAAKEKREQEPVKPN
Contig_42         QEAKLMFEFKKKQEEQRIRKEMEEKKAREAEAKRRRLEEAERKRQAMLAAKEKREQEPVKPN
                   *****:*****:*****

RaJAP88178.1      FVITKREGEDMA-SALGSSGFDKFTNIMYARGEMGKTKEQMEEDKKAILSFRIKPLEIEG
Contig_22         FVITKREGEDMAGSALGSSGFDKFANIMYARGEMGKTKEQMEEDKKAILSFRIKPLEIEG
Contig_42         FVITKREGEDMAGSALGSSGFDKFANIMYARGEMGKTKEQMEEDKKAILSFRIKPLEIEG
                   *****:*****

RaJAP88178.1      LTVEQLREKAKQLWERVVSLESEKYDLEERQKRQDYDLKELAERQRQINRSRALKKGLDP
Contig_22         LTVEQLREKAKELWEKVVNLESEKYDLEERQKRQDYDLKELAERQRQINRSRALKKGLDP
Contig_42         LTVEQLREKAKELWEKVVNLESEKYDLEERQKRQDYDLKELAERQRQINRSRALKKGLDP
                   *****:***:*.*****

RaJAP88178.1      EALQGHPPKIQVASKYERRTDRRTFTDKRELFSGGLEAMIDAESKQWEEKMLSFKESA
Contig_22         EALQGHPPKIQVASKYERRTDRRTFVDKRELFSGGLEAMDAESKQWEEKMVNFKESA
Contig_42         EALQGHPPKIQVASKYERRTDRRTFVDKRELFSGGLEAMDAESKQWEEKMVNFKESA
                   *****.*****:*****:

RaJAP88178.1      RSGLPKWDPENPKNKQVSRTRRMEEDDEDELEP VFEPKPVETPKPAPPAPKAPPPQQ
Contig_22         RGGLPKWDPENPKNKQVMRSRREVDDEEDDELEP VFEPKPIE-----
Contig_42         RGGLPKWDPENPKNKQVMRSRREVDDEEDDELEP VFEPKPIETPKPAPPAPKAPVQQ-
                   *.*****:***:***:*****:

RaJAP88178.1      EEEEEEEEEEEEEDEEEEE
Contig_22         -----
Contig_42         -----

```

**Figure S4.** Multiple sequence alignment (Clustal Ω) of the deduced amino acid sequence for troponin T (contig 22, 1<sup>st</sup> legs; contig 42, 4<sup>th</sup> legs) identified in the top 50 most abundant transcripts of the illumina 1<sup>st</sup> and 4<sup>th</sup> leg transcriptomes of unfed virgin adult male *Dermacentor variabilis* versus the top GenBank BLAST hit (lowest expect value; Table 1, Table 2). Asterisks (\*) denote conserved residues, colons (:) indicate conservation between groups of strongly similar properties scoring >0.5 in the Gonnet PAM 250 matrix, and periods (.) indicate conservation between groups of weakly similar properties scoring ≤0.5 on the Gonnet PAM 250 matrix. The black bar shows the troponin domain. The acronym consists of the first letter of genus and species (*Rhipicephalus appendiculatus*, Ra) followed by the GenBank accession number for the protein BLAST hit (JAP88178.1).

```

Contig_17      MEAIKKKMQAMKLEKDNAVDRAETAEGQSREAALRAEKAEVEVRSIQKKIQQIENELDQV
Contig_239    MEAIKKKMQAMKLEKDNAVDRAETAEGQSREAALRAEKAEVEVRSIQKKIQQIENELDQV
RmAMB19056.1 MEAIKKKMQAMKLEKDNAVDRAETAEGQSREAALRAEKAEVEVRSIQKKIQQIENELDQV
*****

Contig_17      QEQLSQANSKLEEKDKALQAAEAEVAAHNRRIQLLEEDLERSEERLKIATQKLEEASQAA
Contig_239    QEQLSQANSKLEEKDKALQAAEAEVAAHNRRIQLLEEDLERSEERLKIATQKLEEASQAA
RmAMB19056.1 QEQLSQANSKLEEKDKALQAAEAEVAAHNRRIQLLEEDLERSEERLKIATQKLEEASQAA
*****

Contig_17      DESERMRKMLEHRSITDEERMDGLEGLKEARTMAEDADRKYDEVARKLAMVEADLERAE
Contig_239    DESERMRKMLEHRSITDEERMDGLEGLKEARTMAEDADRKYDEVARKLAMVEADLERAE
RmAMB19056.1 DESERMRKMLEHRSITDEERMDGLEGLKEARTMAEDADRKYDEVARKLAMVEADLERAE
*****

Contig_17      ERAETGETKIVELEELRVVGNNLKSLEVSEEKALQKEETYEMQIRQMTNRLQEAERAE
Contig_239    ERAETGETKIVELEELRVVGNNLKSLEVSEEKALQKEETYEMQIRQMTNRLQEAERAE
RmAMB19056.1 ERAETGETKIVELEELRVVGNNLKSLEVSEEKALQKEETYEMQIRQMTNRLQEAERAE
*****

Contig_17      FAERSVQKLQKEVDRLEDELVQEKEKYKAISDELDTFSELTGY
Contig_239    FAERSVQKLQKEVDRLEDELVQEKEKYKAISDELDTFSELTGY
RmAMB19056.1 FAERSVQKLQKEVDRLEDELVQEKEKYKAISDELDTFSELTGY
*****

```

**Figure S5.** Multiple sequence alignment (Clustal  $\Omega$ ) of the deduced amino acid sequence for tropomyosin (contig 17, 1<sup>st</sup> legs; contig 239, 4<sup>th</sup> legs) identified in the top 50 most abundant transcripts of the illumina 1<sup>st</sup> and 4<sup>th</sup> leg transcriptomes of unfed virgin adult male *Dermacentor variabilis* versus the top GenBank BLAST hit (lowest expect value; Table 1, Table 2). Asterisks (\*) denote conserved residues. The acronym consists of the first letter of genus and species (*Rhipicephalus microplus*, Rm) followed by the GenBank accession number for the protein BLAST hit (AMB19056.1).



genus and species (*Ixodes scapularis*, Is) followed by the GenBank accession number for the protein BLAST hit (EEC05627.1).

```

contig_343          -----GCCAAGGTC-----G
AaJZ183505.1      CTGGAGTTGTTGGGTCTATACCACACTGTTCCCTTTGTCCTTTCTGGTCGGAGTCGAGGA
                      * *...*** .

contig_343          TCTGATATGAAGACTGCCGTGGTGTGTTGTGCTGGCCGCCTGCCTTGTGGCTGTGGCGATG
AaJZ183505.1      TTTGTGATGAAGGCTGCTGTGGTGTGTTGTGCTGACAGCCTGCCTCCTGGCCAGGGCC---
* **: *****.***** ***** *.....***** * * *

contig_343          AGTGCTGGAGGCCGGCTTCGCGCCGT--GAAGAATTCAACAGATGGAGGGACTGTATG
AaJZ183505.1      AGCGCTGGCAGCCGGCTGAGAGCCCGGGCCAGTTTGACCAATGGAGGCAGTGCATG
** *****.***** .***** *.. *..* *..***** * * *

contig_343          GTTGAAAGCTACCGACTGATAAAATACAGGAGTACCAAACCTGCCGCAACCAGTCCCGT
AaJZ183505.1      GTGGATAAGCTTCCCCTGACAAAGCCAGTGTTCAGGGCTGCCACAACACAGCGGCT
** *.:*****:* ***** *.. *..*:*:*: *.. *****.*****.. * *

contig_343          GGTACTGAGATGCGCAGGTTTCAGACAGGGCCTGGAGTGCCTTCTGAGAAGCTACAACCTC
AaJZ183505.1      GGAACAGAGATGCGCAAGTTCAGACAGGGCCTGGAATGTGCTCTGGACAGCTACCAACTC
**:*:*:*****.*****.*****.*** ** *..*****.* **

contig_343          GTTGAAAAGAACGATGTCAACTTGAGCCGCATGAGGGAGCTGGCTCAGAATGTCACAAAG
AaJZ183505.1      GTGGAAGGAACAATGTGAAGTGGCCCGGATGACTGAGGTGGCTCCCACCATCGCCAAG
** ****.****.**** *****. ** ***** ** *****. *..**.* **

contig_343          CCGGAACTGAGGGCTGCTTTTGAAGAGTGCCCCAGGACGAACACAACAGCAG-AGTCGC
AaJZ183505.1      GAGGAGCTGAAGAAAGCCTTTGAAGACTGCCCCAGGACGAAGGCAACAAAAGGGGTGGC
.***.***.*.:** ***** *****.***** .*****..** .** **

contig_343          AAAGGCGGTGAAGTGCATCGACCGCCTCGAAACGTCCTGCCTGTACCTGCTGGTGA
AaJZ183505.1      AAAGGCTGTCAAGTGCATCGACCACTTGAAACCACGTCCTGTACCAAGCGGC--
***** ** *****.*** ***** :* *****:.* **

contig_343          GGACAGGGAGTAAAGACTGACATCGTTGCGACGTCAGACAGCCCACTGGATAACCACTAT
AaJZ183505.1      GGACAGAGCT-AAATGCTGCCATCACCGCCA-----
*****.*. *** .***.***. ** *

```

**Figure S7.** Multiple sequence alignment (Clustal  $\Omega$ ) of the nucleic acid sequence for a putative *Amblyomma americanum* odorant-binding protein coding expressed sequence tag (EST; JZ183505.1) versus a homologous transcript (contig 343) identified in the 4<sup>th</sup> leg transcriptome of unfed virgin adult male *Dermacentor variabilis*. Asterisks (\*) denote conserved residues, colons (: ) indicate conservation between groups of strongly similar properties scoring >0.5 in the Gonnet PAM 250 matrix, and periods (.) indicate conservation between groups of weakly similar properties scoring  $\leq 0.5$  on the Gonnet PAM 250 matrix. The acronym consists of the first letter of genus and species (*Amblyomma americanum*, Aa) followed by the GenBank accession number for the protein EST (JZ183505.1).

```

contig_114      -----CACGACGGAA-GTCTGTATC--GCGCGTAACAAGCGGCT
AaJZ172282.1  GCAGCTTCTCTCCACTATCAGCCCAGCGGAGCGACTG-AGCGTGCGCAAACATGGTGGCT
                *.*.*.*.*. *:*** * *  ***.:*.:.* *.*
contig_114      TA-CGGTCGGCCCTCAGGCTGTGGGTGCCGTACGCACAACGCTCTAAGGCGTTGTGAA
AaJZ172282.1  TTCAAGCGGCCCTCCTCTCTGTGTCTCGTCTCCGGCGGCCTACTGCC---AGTC
*: .:* *****. ** * * ** * **.* .*.** **:.* *   :*:.
contig_114      GCGTCTTAGCG-ACTCTCTCGGTCACCTCACCGCCAGGAATGATGCGCTCGCAACAGG
AaJZ172282.1  GGCGGCCGAGCCCCCGCGCCGGACATC-----AACTGGGAAA--GTGCCCCAGCTGC
*** *  ** . * * * **:* ** *   .*. **.*:.. * * * **.*:*
contig_114      CTC-TACAAATGGGAAA-----TGAATGGCTTCTTTATTGACGACTGTTGAGCTTACA
AaJZ172282.1  AGCCATCTAAGGAGAAAGACAACAGAAGGCCCTAGTCATTGACACCTGCCTCGAG---A
. * :*:** *.*****      :*** * * * . * *****.* ** . *
contig_114      GGGTTCTGTATTTTCTTTCCGGCATAGTGTACTGTGCTCTTCTTTGTCCGATGC
AaJZ172282.1  AGGT-----GCCCTTCCCGATGTCGAGCAGCTAACGAGACCGTGATCCAGCAGC
.* **      *** ** . *.*:* ** * *. * . : ** * .***. :***
contig_114      -CCGAGTGGCATTTCCTTTGGTTGTGACGCGGAGTAGGAAGAAGGAGCCGGCGTGCG
AaJZ172282.1  ACCGCGAGGATGTCACCACTTGCCTCTCCACAGCGAGGGAT-----
**.*:*:*.: * .**.* **      .*.**.*:.***:*
contig_114      AAGTGAGACAAACAGAAAACCCAGAGGACCGTCGCGGTTACGAGGAAGTCGGCAGAAAC
AaJZ172282.1  ---GGTCAACAAGAACGGCCA-----GTATCGCTTCGACCGT-----GCCAGGACC
* . :***.*.*.*. **      **.* ** **.*.*.* * **.*.*
contig_114      GAGGAAATGACTGAAGAGCCAGGCTGACGATTCACGGGGTGATTTAGATCACAACGTT
AaJZ172282.1  GAGATCTGAACA-----AGAAGCTCGCCGCCGACGTCGAGCCCAA--GGT
***.:**.*.*. .           .**:*:** ** ** *.* **.* ** *
contig_114      GCTTTGAGAACTCGGAGTCAGTCGGGGCTCGGTGCGAGACTTAACCATGGCCGGCGCG
AaJZ172282.1  GC-----TCGCCAAGCACGACGAGTGCAAGAAGGA-----GGCCGAGGAGAAGTTCC
**           : * * .** .*:**.* **.*:*:* . .**.***.* **
contig_114      CCAGCCTGTGGCCCGCCCTGGATCTG-----GATGCCACAGATCTG
AaJZ172282.1  CCCACCAGTTCGTCGCCAGGTGCAGCTGTACCAGGCCTGCATGGACTACCACATCTCCC
**.***:* **      *****:*: *:*           ..*.***.* **
contig_114      AGAGATGTGGTAATC-----CATGCAAGCC----TGGTACAGCTGCACCTGAGCCACAAA
AaJZ172282.1  AGATCTGTGGCATCCAGATCCAGGGTGCCAGGGCGGAGCTGCCGCGCCGGCC-C----A
*** .***** *: *      ** * :. **      **:.*:* ** **.* * *
contig_114      CTGGTGGGCGAACTTCTCCTCGGCCTCCTTCTGCACTCGTCTGCTTAGCGAGCACCTT
AaJZ172282.1  CGGCTAAGCCAACGCCGCCG-AGCCAACCTTCGCTGACTCCGAGTCTCAAAGCAACGT
* * *.** ** * ** .***:***** **: : * **:* * : ..**.*.*
contig_114      AGAGCTTCTGTTCAAGATC-TCAGTCTGGCACGGTCGAAGCG-GTACTGGCC-----
AaJZ172282.1  TGTGATCCAAATCATGAATCGTCAGCCTGGGCTCTGCAGCTTCCAGTCATTTCTCTGTTT
:*. * * :*:.* .:..** ** * * **:* * * .*: * **.* **
contig_114      -----G--TTCTTGTGAACCAT-CCTTCGCTGTGGAGAGCGAGGTGGTGCCTCTCA
AaJZ172282.1  CTTCCGACTTCTGCTGAACAGACCCCCCGTGAAA-----
* ** * * **.*.: ** *****:..

```

**Figure S8.** Multiple sequence alignment (Clustal  $\Omega$ ) of the nucleic acid sequence for a putative *Amblyomma americanum* odorant-binding protein coding expressed sequence tag (EST; JZ172282.1) versus a homologous transcript (contig 114) identified in the 4<sup>th</sup> leg transcriptome of unfed virgin adult male *Dermacentor variabilis*. Asterisks (\*) denote conserved residues, colons (:) indicate conservation between groups of strongly similar properties scoring >0.5 in the Gonnet PAM 250 matrix, and periods (.) indicate conservation between groups of weakly similar properties scoring  $\leq 0.5$  on the Gonnet



PAM 250 matrix. The acronym consists of the first letter of genus and species (*Amblyomma americanum*, Aa) followed by the GenBank accession number for the protein EST (JZ172282.1).

```

contig_466      ARRWHGHGTSLKSSFQARARGVSRRSFNTETIMLPSVCLALLVVSFVDRNGVYANPKTMK
contig_39297   -----RARGVSRRSFNTETIMLPSVCLALLVVSFVDRNGVYANPKTMK
AaJZ171538.1   -----PAR*TTMLPLSLIALIASALTA*NGVQASPKTM
                * **      :*: .  :.:  ** * .***:

contig_466      DDFNPLKFKGKWWVDSFNQAIYGDADRCAHFTIHKDHDVYKIKAEYIDTDNELVEMSVE
contig_39297   DDFNPLKFKGKWWVDSFNQAIYGDADRCAHFTIHKDHDVYKIKAEYIDTDNELVEMSVE
AaJZ171538.1   DNFIPSKFEGKWWVDSFSQVIYGDADRCAHFTIKKNHDNVYKIQAEYVDSNELVEMTVD
                *: *  * *:*****.*.*****:*.**:***:***:*.*****:*.

contig_466      VKEDDRHPSRFILKINADVIMETAIIDTDYDNWAVVWAKSGTAAAYHVVTRKPNQEDQFL
contig_39297   VKEDDRHPSRFILKINADVIMETAIIDTDYDNWAVVWAKSGTAAAYHVVTRKPNQEDQFL
AaJZ171538.1   VNEDDRHPSRFILKIDADNIFETAIIDTDYDNWAIWAKSGTAAAYHVVTRKPNQEDQFL
                *:*****:*. *:*****:*****:*****:*****:*****:

contig_466      PAIQAAALDKEGLKKDDFKKVPNMDCSKKDTI*LTESK*ICX--
contig_39297   PAIQAAALDKEGLKKDDFKKVPNMDCSKKDTI*LTESK*ICNKX
AaJZ171538.1   PAIQKALDKEGLKKDAFRKVPNMDCTKKDKHLGVKEINECYX-
                **** ***** *:*****:***.  :.:  *

```

**Figure S9.** Multiple sequence alignment (Clustal  $\Omega$ ) of the deduced amino acid sequence for a lipocalin (contig 39297, 1<sup>st</sup> legs; contig 466, 4<sup>th</sup> legs) identified in the illumina 1<sup>st</sup> and 4<sup>th</sup> leg transcriptomes of unfed virgin adult male *Dermacentor variabilis* versus the putative *Amblyomma americanum* chemosensory lipocalin coding expressed sequence tag (EST; JZ171538.1). Asterisks (\*) denote conserved residues, colons (:) indicate conservation between groups of strongly similar properties scoring >0.5 in the Gonnet PAM 250 matrix, and periods (.) indicate conservation between groups of weakly similar properties scoring  $\leq 0.5$  on the Gonnet PAM 250 matrix. The acronym consists of the first letter of genus and species (*Amblyomma americanum*, Aa) followed by the GenBank accession number for the protein EST (JZ171538.1).

```

contig_84287 -----TVALHKVMYLDKKGCCI
AtJAC30054.1  TLRARQYKIVNDLISMKVIFKVSKTGVHKDYNVRYQHGLDQPWRERKLMYISPEKTCAI
                .*.*. : **

contig_84287  LVQDIGDGKKGKQLLRTEAYIETDVPEECHRVIKQNCCKGTVLTKMYERKCKRYNQVLIPRT
AtJAC30054.1  LVEELGKGRKGCQLVQPESAIIDGIPPECHKIYKASCGKTSVQVYEHACRSLPDASPRHR
                **...*.*****:*.*. :*****:** * *...*:*. :. :

contig_84287  L*THFICIAYHTARX
AtJAC30054.1  EL-----

```

**Figure S10.** Multiple sequence alignment (Clustal  $\Omega$ ) of the deduced amino acid sequence for the putative lipocalin (contig 84287) identified exclusively in the Haller's organ spf transcriptome of unfed virgin adult male *Dermacentor variabilis* versus the top BLAST GenBank hit (lowest expect value; Table 3). Asterisks (\*) denote conserved residues, colons (:) indicate conservation between groups of strongly similar properties scoring  $>0.5$  in the Gonnet PAM 250 matrix, and periods (.) indicate conservation between groups of weakly similar properties scoring  $\leq 0.5$  on the Gonnet PAM 250 matrix. The acronym consists of the first letter of genus and species (*Amblyomma triste*, At) followed by the GenBank accession number for the protein BLAST hit (JAC30054.1).

```

contig_4943 VSRLLLLAQADPNARTNCLNRPALLVLSAYEGFT-----
contig_8166 VSRLLLLAQADPNARTNCLNRPALLVLSAYEGFT-----
IsEEC13968.1
HaAHV83756.1 VPLHSAVHGGDIKAVELCLKSGAKISTQQYDLSTPVHLCAQGALEIVKLMFTMQPTEKL
CpAOR16348.1 TVLQAAIEAEWVPGVVALEAGADVTLRANDGETPIHSAAAIGNIEVLSEILSLAKQSKF
CpAAOR16350.1 TVLQAAIEAEWVPGVVALEAGADVTLRANDGETPIHSAAAIGNIEVLSEILSLAKQSKF

contig_4943 -----DMVTSLVFEGADVNVASDVGRTALSMACERGHFEIAK
contig_8166 -----DMVTSLVFEGADVNVASDVGRTALSMACERGHFEIAK
IsEEC13968.1 -----GASMTATDKEGRSVILLAAARGAWKTVT
HaAHV83756.1 ACLTSCDVQKMTPVHCAAMFDHPDIVNYLISEGSDINPLDKERRSPLLLAASRAGWRTVH
CpAOR16348.1 -----IDCQNDGEGETPLFKAITNGHVACVR
CpAAOR16350.1 -----IDCQNDGEGETPLFKAITNGHVACVR
: . . . : * . . .

contig_4943 YLLSCGARIDHVDSEGLSALA-YAASSGHLDLVTHLVQCKWPDFGIALGLHRAAQALI
contig_8166 YLLSCGARIDHVDSEGLSALA-YAASSGHLDLVTHLVQCKWPDFGIALGLHRAAQALI
IsEEC13968.1 TLLTLGADLTVKDNLRRNLLHHIVLSGGCLD-----DF-----
HaAHV83756.1 TLIRLGADIELKIDINSRNVLHVMVNGGRLE-----DF-----
CpAOR16348.1 ALLKDGAAIDKTLPGDINVLH-VAADHGHE-----
CpAAOR16350.1 ALLKDGAAIDKTLPGDINVLH-VAADHGHE-----
* : * * : . * . . * * :

contig_4943 AAASKGHTEVCEFLD--MMEVQVVKQDDFSGHTALTAASLAGHRDVCALLMRRGASAL
contig_8166 AAASKGHTEVCEFLD--MMEVQVVKQDDFSGHTALTAASLAGHRDVCALLMRRGASAL
IsEEC13968.1 -----YNEINERLQD-----FALLNERDMQGCTAMHYASRNGQLKTIEGLL-----
HaAHV83756.1 -----AATCKLTLQNRCDKSLAQLLNEKDSAGCSPLHYASREGHIRSLENLIRLGACIN
CpAOR16348.1 -----ILKCLLEYDRSYQMLNVLTAADRRGMGPIHFVAVSGNHYECVKFLEKNADIR
CpAAOR16350.1 -----ILKCLLEYDRSYQMLNVLTAADRRGMGPIHFVAVSGNHYECVKFLEKNADIR
* : . * * . : * . : * :

contig_4943 VRSN---AGEPPLCCAVREGHWAVTELLCHARA---LEQADALGRSPLMLAAAEHGLG
contig_8166 VRSN---AGEPPLCCAVREGHWAVTELLCHARA---LEQADALGRSPLMLAAAEHGLG
IsEEC13968.1 -----QYGRYNTVRHLLSEKKGHLIINEMDGEKGPLHIASQNGHTR
HaAHV83756.1 LKNS---NNESPLHFAARYGRYHTACQLLDSKGTFFIINESDGEGLTPLHIASREGHTR
CpAOR16348.1 LRTTCSPHKSSSTPLHIAAAKNYSEVAKVILVMDKTT--IHEVNSMGWFPLHTAAHSSRE
CpAAOR16350.1 LRTTCSPHKSSSTPLHIAAAKNYSEVAKVILVMDKTT--IHEVNSMGWFPLHTAAHSSRE
. . . : * : : . : * * * : . .

contig_4943 VLELLLAKGANLLWQDKDGLSALSWSCSRGLQAAQCLLT-HGADINHSDKRGRTPLDMA
contig_8166 VLELLLAKGANLLWQDKDGLSALSWSCSRGLQAAQCLLT-HGADINHSDKRGRTPLDMA
IsEEC13968.1 VVHLLLVKGA-LLHRDHRGRTPLHYAVTNGFTHTMEQLLAVHSHLLDQSDRDG-----
HaAHV83756.1 VVHLLLNKGA-LLHRDHNGRNPPLHAAAMSGYTQTIELLHSHVSHLLDQSDKDGNTPLHLA
CpAOR16348.1 VIALLLKDKGA-NL-----AGYT-----DGPKKF---
CpAAOR16350.1 VIALLLKDKGA-NL-----AGYT-----DGPKKF---
* : * * * * * * * * * *

contig_4943 ATQGNAEVIKLLNNGAEIEHVLDLNGTRALDRAIG-----TGNLDAINCFLQAG
contig_8166 ATQGNAEVIKLLNNGAEIEHVLDLNGTRALDRAIG-----TGNLDAINCFLQAG
IsEEC13968.1
HaAHV83756.1 TMENKPNISIALLSMGCRSLSYNNLDMS-AIDYAIYKFPPEALAMVTHEHRAKEVMAIIRS
CpAOR16348.1 ---RRTAIDMLL-----NNLSK-----PTEYLEEVLDTYITSNTQNLQ-
CpAAOR16350.1 ---RRTAIDMLL-----NNLSK-----PTEYLEEVLDTYITSNTQNLQ-

contig_4943 AKIGSQTWEMAAGKPDVVHLLLNKLDHGDGALLYRKGHMKDAVHRY-QYALKKFPSSVVE-
contig_8166 AKIGSQTWEMAAGKPDVVHLLLNKLDHGDGALLYRKGHMKDAVHRY-QYALKKFPSSVVE-
IsEEC13968.1
HaAHV83756.1 DRHPCVTLALIAVMPRVFEAVQDK-----CITKANCKDKSKSFYIKYSFKFYQRSKLEW
CpAOR16348.1 DNSVVTVDFAVLIPNVCEMEQMK-----VIE-----
CpAAOR16350.1 DNSVVTVDFAVLIPNVCEMEQMK-----VIE-----

```

**Figure S11.** Multiple sequence alignment (MAFFT, E-INS) of the deduced amino acid sequence for the putative TRPA transcripts (contig 4943 and 8166) identified in the illumina 1<sup>st</sup> and 4<sup>th</sup> leg transcriptomes of unfed virgin adult male *Dermacentor variabilis* versus the *Ixodes scapularis* TRPA homolog and putative insect olfactory TRPA splice variants. Asterisks (\*) denote conserved residues, colons (:) indicate conservation between groups of strongly similar properties scoring >0.5 in the Gonnet PAM 250 matrix, and periods (.) indicate conservation between groups of weakly similar properties scoring ≤0.5 on the Gonnet PAM 250 matrix. The black bar shows the 3 copies of Ankyrin repeats. The acronym consists of the first letter of genus and species (*Ixodes scapularis*, Is; *Helicoverpa armigera*, Ha; *Cydia pomonella*, Cp) followed by the GenBank accession number (EEC13968.1; AOR16348.1 AOR16350.1; AHV83756.1).

```

contig_72702      WKHSSRSAKMGQQTSSSSLPRAKVTKLMTAVVFGAFLVTNVPYMQEAILAFGNPGILDA
IsEEC06829.1     -----MVKTLKMTVVVFGAFLVTNVPYMQEMILAFGNPGILDH
                   *****.*****
contig_72702      NLVALFGVISASNSAINPYIFL-----
IsEEC06829.1     NVVALFGVISASNSAINPYIYFFFQRSKRQCGKFCALLKDAKTWFSRRLRNLCNSQSA
                   *:*****:
contig_72702      -----
IsEEC06829.1     SSPVTMTSLHLNGDYAMTSWNTGTQVEIRSPNKVDV

```

**Figure S12.** Multiple sequence alignment (Clustal  $\Omega$ ) of the deduced amino acid sequence for the putative G-protein coupled receptor (contig 72702) identified exclusively in the Haller's organ spf transcriptome of unfed virgin adult male *Dermacentor variabilis* versus the top BLAST GenBank hit (lowest expect value; Table 3). Asterisks (\*) denote conserved residues, colons (:) indicate conservation between groups of strongly similar properties scoring >0.5 in the Gonnet PAM 250 matrix, and periods (.) indicate conservation between groups of weakly similar properties scoring  $\leq$ 0.5 on the Gonnet PAM 250 matrix. The acronym consists of the first letter of genus and species (*Ixodes scapularis*, Is) followed by the GenBank accession number for the protein BLAST hit (EEC06829.1).

```

contig_83622      -----
AsJAT99189.1     ARYGLEPSFQSC TIDWRHNDASYKSF TVVYFVLGFLVPACIVVVCYRTSAAHIRVPKPTV

contig_83622      ----DMNDDFWANQDSVTMMVVLIVATFFAAWTPYAVLCLWAVFGKASAVPHLVAVVPPL
AsJAT99189.1     VRR TDMNDDFWANQESVTTMVVLI VAAFFAAWTPYAVLCLWAVFGNVASVPHLVAVLPPL
                  *****:*** *****:*****:..:*****:***

contig_83622      FCKTASAINPFIYFFSNPRIRTDIYALLTCRCCTLGRRSCSIQEDYC
AsJAT99189.1     FCKTASAINPFIYFFSNPRIRTDIYALLTCRCQAMGRRSCSIEEDYC
                  *****:..:*****:****

```

**Figure S13.** Multiple sequence alignment (Clustal  $\Omega$ ) of the deduced amino acid sequence for the putative G-protein coupled receptor (contig 83622) identified exclusively in the Haller's organ spf transcriptome of unfed virgin adult male *Dermacentor variabilis* versus the top BLAST GenBank hit (lowest expect value; Table 3). Asterisks (\*) denote conserved residues, colons (:) indicate conservation between groups of strongly similar properties scoring  $>0.5$  in the Gonnet PAM 250 matrix, and periods (.) indicate conservation between groups of weakly similar properties scoring  $\leq 0.5$  on the Gonnet PAM 250 matrix. The acronym consists of the first letter of genus and species (*Amblyomma sculptum*, As) followed by the GenBank accession number for the protein BLAST hit (JAT99189.1).

```

contig_13937      MGCAMSAEERAALARSKQIEKNLKEDGIQAAKDIKLLLLGAGESGKSTIVKQMKIIHDSG
RpJAA58325.1    ---MSAEERAALARSKQIEKNLKEDGIQAAKDIKLLLLGAGESGKSTIVKQMKIIHDSG
                  *****

contig_13937      FTQEDFKQYKPVVYSNTIQSMVAILRAMPNLGISFGNNEREADAKMVFVVARMEDTEPF
RpJAA58325.1    FTQEDFKQYKPVVYSNTIQSMVAILRAMPNLGISFGNNEREADAKMVFVVARMEDTEPF
                  *****

contig_13937      SEELLSAMKRLWTDSGVQECFGRSNEYQLNDSAKYFLDDLDRLGKKDYMPTEQDILRTRV
RpJAA58325.1    SEELLSAMKRLWTDSGVQECFGRSNEYQLNDSAKYFLDDLDRLGKKDYMPTEQDILRTRV
                  *****

contig_13937      KTTGIVEVHFSEFKNLNFKLFDVGGQRSEKRWIHCFFEDVTAIIFCVAMSEYDQVLHEDET
RpJAA58325.1    KTTGIVEVHFSEFKNLNFKLFDVGGQRSEKRWIHCFFEDVTAIIFCVAMSEYDQVLHEDET
                  *****

contig_13937      TNRMQESLKLFDSDICNNKWFDTDSIILFLNKKDLFEKIKKSPLTICFPEYTGAEYGEA
RpJAA58325.1    TNRMQESLKLFDSDICNNKWFDTDSIILFLNKKDLFEKIKKSPLTICFPEYTGAEYGEA
                  *****

contig_13937      AAYIQAQFEAKNKSTTKEIYCHMTCATDTTNIQVFDAVTDVVIANNLRGCGLY
RpJAA58325.1    AAYIQAQFEAKNKSTTKEIYCHMTCATDTTNIQVFDAVTDVVIANNLRGCGLY
                  *****

```

**Figure S14.** Multiple sequence alignment (Clustal  $\Omega$ ) of the deduced amino acid sequence for the putative G-protein  $\alpha_0$  subunit (contig 13937) identified exclusively in the Haller's organ spf transcriptome of unfed virgin adult male *Dermacentor variabilis* versus the top BLAST GenBank hit (lowest expect value; Table 3). Asterisks (\*) denote conserved residues and colons (:) indicate conservation between groups of strongly similar properties scoring  $>0.5$  in the Gonnet PAM 250 matrix. The black bar shows the  $G\alpha$  subunit domain. The acronym consists of the first letter of genus and species (*Rhipicephalus pulchellus*, Rp) followed by the GenBank accession number for the protein BLAST hit (JAA58325.1).

```

Contig_24477          -----ISSDGAYAL
IrJAB79904.1        QIATNPKFPD TVLSSSRDKTLILWRLTRDDASYGVATRRLRGHGHFVTDVVLSSDGQYAL
                                     :****  ***

Contig_24477          SASWDKSLRLWELETGNTTRTFVGHTNDVLSVSFSADNRQIVSGSRDRTIKLWNTLGDC-
IrJAB79904.1        SCSWDKTLRLWDLAVGSSTRRFEGHEKDVLSVAFSADNRQIVSGSRDKTIKLWNTLAECK
*.****:****:*  .*.:** * ** :*****:*****:*****.:**

```

**Figure S15.** Multiple sequence alignment (Clustal  $\Omega$ ) of the deduced amino acid sequence for the putative G-protein  $\beta$  subunit (contig 24477) identified exclusively in the Haller's organ spf transcriptome of unfed virgin adult male *Dermacentor variabilis* versus the top BLAST GenBank hit (lowest expect value; Table 3). Asterisks (\*) denote conserved residues, colons (:) indicate conservation between groups of strongly similar properties scoring  $>0.5$  in the Gonnet PAM 250 matrix, and periods (.) indicate conservation between groups of weakly similar properties scoring  $\leq 0.5$  on the Gonnet PAM 250 matrix. The black bar shows the WD G $\beta$  repeat domain. The acronym consists of the first letter of genus and species (*Ixodes ricinus*, Ir) followed by the GenBank accession number for the protein BLAST hit (JAB79904.1).

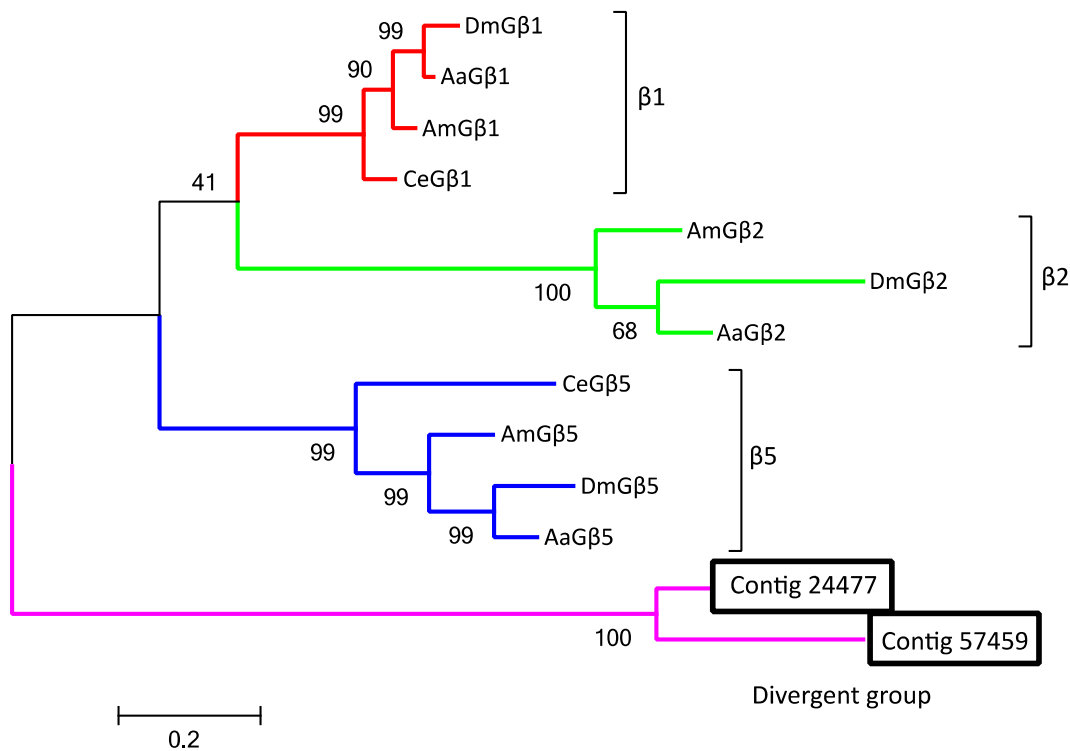

**Figure S16.** Phylogenetic relationship of a transcript putatively encoding G-protein  $\beta$  subunits ( $G\beta$ ) identified in the Haller's organ spf transcriptome (contig 24477) and a transcript found common in both the illumina 1<sup>st</sup> and 4<sup>th</sup> leg transcriptomes (contig 57459, 1<sup>st</sup> legs) of unfed, virgin adult male *Dermacentor variabilis* with  $G\beta$  subunits of known clade annotation from *Caenorhabditis elegans* and insects. The phylogenetic tree shows four clades, each represented by a branch color as follows: red =  $\beta 1$  clade; green =  $\beta 2$  clade; blue =  $\beta 5$  clade; purple = novel divergent clade. Acronyms are as follows: first letter of the genus and species (*Aedes aegypti*, Aa; *Apis mellifera*, Am; *Drosophila melanogaster*, Dm; *Caenorhabditis elegans*, Ce) followed by the protein name ( $G\beta$ ) and the number of the clade number. Putative  $G\beta$  subunit transcripts are boxed. The tree was constructed using Maximum likelihood phylogenetic analysis and bootstrapping set to 500 iterations. Branch values listed are bootstrap percentages (percent confidence), scale set to 20%. A comprehensive list of acronyms and associated GenBank accession numbers are listed in Appendix A.



```

contig_3088      SWLQSARPHR*TSASGVLDTPVAQAVSALFSR*FSLRSGSARLKFSGPREAYPSYDSGA
RpJAA63082.1    -----PTRQTRHGP--GSQSSRGKAYPSLHEGA
                  . * *      . * . :**** . .**

contig_3088      TTAADAMDKESIKKQIENLRYQAQMERWPLSKSIQALREYIEENERTDPLIHAPDKKSNP
RpJAA63082.1    TTAYTTMDKESIKKQIENLRYQAQMERWPLSKSIQALREYIEENERTDPLIHAPDKKSNP
***      :*****

contig_3088      WAEKGKCLIM*TEDISALLTPAGLLVLLLVLFWPYYFYFA*NQQAGRDSPDETP*LLQQS
RpJAA63082.1    WAEKGKCLIM-----
*****

```

**Figure S17.** Multiple sequence alignment (Clustal  $\Omega$ ) of the deduced amino acid sequence for the putative G-protein  $\gamma$  subunit (contig 3088) identified in the illumina 4<sup>th</sup> leg transcriptome of unfed virgin adult male *Dermacentor variabilis* versus the top BLAST GenBank hit (lowest expect value; Table 3). Asterisks (\*) denote conserved residues, colons (:) indicate conservation between groups of strongly similar properties scoring >0.5 in the Gonnet PAM 250 matrix, and periods (.) indicate conservation between groups of weakly similar properties scoring  $\leq 0.5$  on the Gonnet PAM 250 matrix. The black bar shows the WD G $\beta$  repeat domain. The acronym consists of the first letter of genus and species (*Rhipicephalus pulchellus*, Rp) followed by the GenBank accession number for the protein BLAST hit (JAA63082.1).

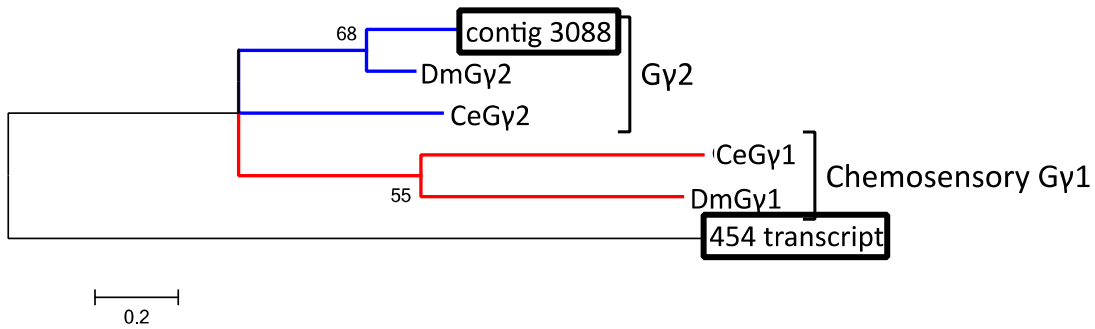

**Figure S18.** Phylogenetic relationship of transcripts putatively encoding G-protein  $\gamma$  subunits ( $G\gamma$ ) identified in the illumina 4<sup>th</sup> leg transcriptome (contig 3088) and the 454 1<sup>st</sup> leg transcriptome (454 transcript) of unfed, virgin adult male *Dermacentor variabilis* with  $G\gamma$  subunits of known clade annotation from *Caenorhabditis elegans* and *Drosophila melanogaster*. The phylogenetic tree shows two clades, each represented by a branch color as follows: red =  $\gamma$ 1, chemosensory clade; blue =  $\gamma$ 2 clade. Acronyms are as follows: first letter of the genus and species (*Drosophila melanogaster*, Dm; *Caenorhabditis elegans*, Ce) followed by the protein name ( $G\gamma$ ) and the number of the clade number. Putative  $G\gamma$  subunit transcripts are boxed. The tree was constructed using Maximum likelihood phylogenetic analysis and bootstrapping set to 500 iterations. Branch values listed are bootstrap percentages (percent confidence), scale set to 20%. A comprehensive list of acronyms and associated GenBank accession numbers are listed in Appendix A.

```

contig_77721      -----AFFAGGWGNDPEITHCALL
IsEEC01411.1     TNSFKDDKLELAYQGYSHRQRTALVIVNLI DVFLKVAMLVAFFVAGELDEPR-LTCALL
                                     ***.* *  ::*  ****

contig_77721     RYLPWVLVNVLLSLLTCWRFFANNYLHWGAALIWIWALNAQGNGNFGVTSGELRFEPGGDV
IsEEC01411.1     RNLPWIAVNLLCLLTYWKFFASNYLHWGALLIWIWALNAEGNGTFGVTWGYLQFEPGGDV
*  ***:  **:*.* ** *:****.***** *****:*.*.*** * *:******

contig_77721     SX-----
IsEEC01411.1     AGDGSWHVMFTVFVITYAMLPLPLKWCIVCGVLASLGHLLVCCLYRAHLDRPEFERMILTN
:

```

**Figure S19.** Multiple sequence alignment (Clustal  $\Omega$ ) of the deduced amino acid sequence for the putative adenylate/guanylate cyclase (contig 77721) identified exclusively in the Haller's organ spf transcriptome of unfed virgin adult male *Dermacentor variabilis* versus the top BLAST GenBank hit (lowest expect value; Table 3). Asterisks (\*) denote conserved residues, colons (:) indicate conservation between groups of strongly similar properties scoring >0.5 in the Gonnet PAM 250 matrix, and periods (.) indicate conservation between groups of weakly similar properties scoring  $\leq$ 0.5 on the Gonnet PAM 250 matrix. The acronym consists of the first letter of genus and species (*Ixodes scapularis*, Is) followed by the GenBank accession number for the protein BLAST hit (EEC01411.1).

```

contig_37845 -----RIE
IsEEC13610.1 ASAADLAVSVSTFCRAFPFHFMCDRQLRLTQLGRGLARIFGGGRSAVPSLFFVLEPELLE
                                         :*

contig_37845 MRFDHVVANINLPFLLQVRDDAIKHERYKGMETKGMVHCPESRALLFLGSPVVDGGLSA
IsEEC13610.1 MRFDHVVAATNLPFLLQVRDDAIKHQRYKGMVKGQMVHCPESETLLFLGSPVVDGGLSA
*****      *****:*****:*****.:*****

contig_37845 MLRRGLYISDVPVHDATRDILLVEEQSRAQDGLKRRMDKIRASIQEANLAVEEERQKNVD
IsEEC13610.1 MLRRGLYISDVPVHDATRDILLVEEQARAQDGLKRRMDKIRSSIQEANLAVEEERQKNVD
*****:*****:*****

contig_37845 LLHLIFPPRVARKLWLGESMEAQQHDQATLLFSDIVGFTAICSTATPMMVINMLX-----
IsEEC13610.1 LLHLIFPPSVARKLWLGESVEAQQHDQVTLFSDIVGFTAICSTATPMMIETVGDAYCVA
***** *****:*****.:*****:

```

**Figure S20.** Multiple sequence alignment (Clustal  $\Omega$ ) of the deduced amino acid sequence for the putative adenylate/guanylate cyclase (contig 37845) identified exclusively in the Haller's organ spf transcriptome of unfed virgin adult male *Dermacentor variabilis* versus the top BLAST GenBank hit (lowest expect value; Table 3). Asterisks (\*) denote conserved residues, colons (:) indicate conservation between groups of strongly similar properties scoring  $>0.5$  in the Gonnet PAM 250 matrix, and periods (.) indicate conservation between groups of weakly similar properties scoring  $\leq 0.5$  on the Gonnet PAM 250 matrix. The solid black bar shows the heme-NO binding domain, and the dashed black bar shows the guanylate cyclase catalytic domain. The acronym consists of the first letter of genus and species (*Ixodes scapularis*, Is) followed by the GenBank accession number for the protein BLAST hit (EEC13610.1).

```

contig_82720      -----QKCSDEERSVGCLPDKLKAEI
IsEEEC03664.1    MKTHQISKLDAVKTYMRMRHVPDHLQNKVIRWFDYLWLTQKSSDEERSVGCLPDKLKAEI
                                     *.*****

contig_82720      AIHVHLDTLKRVEIFQNTTEAGFLCELVLRLRPVLFSPGDYICRKGEVKGEMYIVNRGRLQ
IsEEEC03664.1    AIHVHLDTLKRVEIFQNTTEAGFLCELVLRLRPVLFSPGDYICRKGEVKGEMYIVNRGRLQ
*****

contig_82720      VVTDNGK-----
IsEEEC03664.1    VVTDNGKTVLATLRAGSYFGEISILNMGTAGNRRRTASVRSVGYSDLFCLYKQDMWDVLKD
*****

```

**Figure S21.** Multiple sequence alignment (Clustal  $\Omega$ ) of the deduced amino acid sequence for the putative cyclic nucleotide-gated ion channel (contig 82720) identified exclusively in the Haller's organ spf transcriptome of unfed virgin adult male *Dermacentor variabilis* versus the top BLAST GenBank hit (lowest expect value; Table 3). Asterisks (\*) denote conserved residues, colons (:) indicate conservation between groups of strongly similar properties scoring >0.5 in the Gonnet PAM 250 matrix, and periods (.) indicate conservation between groups of weakly similar properties scoring  $\leq 0.5$  on the Gonnet PAM 250 matrix. The black bar shows the cyclic nucleotide binding domain. The acronym consists of the first letter of genus and species (*Ixodes scapularis*, Is) followed by the GenBank accession number for the protein BLAST hit (EEC03664.1).

|              |                                                                 |
|--------------|-----------------------------------------------------------------|
| CeCNG        | MSAARTEFQNKMDGIKQYMELRKVSKQLEIRVIKWFYDLWTNKQSLSDQQLKVLKVLDPDKLQ |
| Contig_82720 | -----QKCSDEERSVGCLPDKLK                                         |
| DmCNG        | MNVARVEFQNRMDGVKQYMAFRRVGHLEARVIRWFAYTWSQSGALDEERVLAALPDKLK     |
|              | . . .::: : *****:                                               |
|              |                                                                 |
| CeCNG        | AEIAMQVHFETLRKVRIFQDCEAGLLAELVLKQLQVFSFGDFICKKGDIGREMYIVKRG     |
| Contig_82720 | AEIAIHVHLDTLKRVEIFQNTTEAGFLCELVLRLRPVLFSPGDYICRKGEVVKEMYIVNRG   |
| DmCNG        | AEIAIQVHMDTLKQVRIFHDTEPGLLEALVLKQLQVFSFGDYICRKGDVVKEMYIVKRG     |
|              | ****:***:***:*.***: * *:* ***:* :*****:***:***:***:*****:**     |
|              |                                                                 |
| CeCNG        | RLQVVDDDGGKVFVTLQEGSVFGELSILNIAGSKNGNRRTANVRSVGYTDLFVLSKTDLW    |
| Contig_82720 | RLQVVTDNGK-----                                                 |
| DmCNG        | KLSVVGDDGITVLTATLGAGSVFGEVSVLEIAGNRTGNRRRTANVRSLGYSDFCLAKRDLW   |
|              | :*.** *:*                                                       |

**Figure S22.** Multiple sequence alignment (Clustal  $\Omega$ ) of the deduced amino acid sequence for the putative cyclic nucleotide-gated ion channel (CNG)  $\alpha$ - subunit (contig 82720) identified exclusively in the Haller's organ spf transcriptome of unfed virgin adult male *Dermacentor variabilis* versus *Caenorhabditis elegans* and *Drosophila melanogaster* chemosensory CNG  $\alpha$ - subunits. Asterisks (\*) denote conserved residues, colons (:) indicate conservation between groups of strongly similar properties scoring >0.5 in the Gonnet PAM 250 matrix, and periods (.) indicate conservation between groups of weakly similar properties scoring  $\leq 0.5$  on the Gonnet PAM 250 matrix. The black bar shows the cyclic nucleotide binding domain. The acronym consists of the first letter of genus and species (*Caenorhabditis elegans*, Ce; *Drosophila melanogaster*, Dm) followed by the protein name (CNG).

```

contig_01853          TIGTEAAAAEESAKRQGGTRVFKKSSPNGKITMYLGKRDFVDHITSVDPIDGVVLIDPDY
IsEEC07926.1        -----IVIPFRVFKKSSPNSKITMYLGKRDFVDHITSVDPIDGVVLIDPDY
                      *****_*****

contig_01853          VKERKVFQGHVLAAFRYGREDLDVLGLTFRKDLYLASEQIYPPLAE--TAGRPLTRLQERL
IsEEC07926.1        VKDRKVFQGHVLAAFRYGREDLDVLGLTFRKDLYLASEQIYPRLLTTGENSNRPLTRLQVSS
                      *:***** *: .: *****

contig_01853          LRKLGPNAYPFYFEL-PPHCPASVTLQPAPGDTGKPCGVYELKGYVADS---PEDKPHK
IsEEC07926.1        ESSFFFFLSFFYYLFVRNLGWGTTTFPATRLPDGFCNP-QRVNGHCSTAEVTQPRFCSY
                      .:      *:: * . . * ** * .::*: :

contig_01853          RNSVRLAIRKIMYAPSRQGEQPSVEVSKEFVMSPNKLHLEASLDKELYHHGEDIAVNVHI
IsEEC07926.1        RNSVRLAIRKIMYAPSRQGEQPSVEVSKEFVMSPNKLHLEASLDKELYHHGEDIAVNVHI
                      *****

contig_01853          ANNSNRTVKKVKVSVRQFADICLFSTAQYKCTVAEIDSEEGCPVSPGF---TL---SKVY---LR---P---LL
IsEEC07926.1        ANNSNRTVKKVKVSVRQFADICLFSTAQYKCTVAEIDSEEGCPVSPGF---TL---SKV---HY---LR---P---LL
                      *****:*****

contig_01853          ANNKDKRGLALDGQLKHEDTNLASSTIITDPAQKENLGIIVQYKVKV---KL---CL---G---PL---G---GD---L---VA
IsEEC07926.1        ANNKDKRGLALDGQLKHEDTNLASSTM-----
                      *****:

contig_01853          ELPFILMHPKPEESSPIRVVSEPKAPGPVPLDTNLIELDTDAASLDDDDIIFEDFARLR
IsEEC07926.1        -----

```

**Figure S23.** Multiple sequence alignment (Clustal  $\Omega$ ) of the deduced amino acid sequence for the putative  $\beta$ -arrestin (contig 1853) identified exclusively in the Haller's organ spf transcriptome of unfed virgin adult male *Dermacentor variabilis* versus the top BLAST GenBank hit (lowest expect value; Table 3). Asterisks (\*) denote conserved residues, colons (:) indicate conservation between groups of strongly similar properties scoring  $>0.5$  in the Gonnet PAM 250 matrix, and periods (.) indicate conservation between groups of weakly similar properties scoring  $\leq 0.5$  on the Gonnet PAM 250 matrix. The solid black bar shows the arrestin amino terminal domain, and the dashed black bar shows the arrestin carboxyl terminal domain. The acronym consists of the first letter of genus and species (*Ixodes scapularis*, Is) followed by the GenBank accession number for the protein BLAST hit (EEC07926.1).

```

contig_69591      -----SAQTLTWTLFALAINPGVQRRVHDELDRVFGKRAACNITKSHVSKLTYLDRVLKET
IsEEC03681.1     GHDTVTQSLTWTLFVLGIYPDVQSKVHEELDLIFAHDMTRGITRADIADLSYLDRVIKVS
                  :*:*****.*.* * ** :*:*** :*.: : **:::..*:*****:* :

contig_69591      MRIFTIVPWVGRSLTEPLKIGNCTIPEGCTCYVFVTYGIHRDPHTHYTDPEVFDPRFLPEK
IsEEC03681.1     RAFFYHITVSNAS--RVRIFRNYQIPKGTTCFVFTYGLHRDPDHYRDPETFDPRFLPEN
                  :* : * . : * **:* **:*:*****:***** ** ***.*****:

contig_69591      CSRNHPFAFVFPFSAGPRNCIGQKFAMLELKVLLAKVLTNFSVSSCNHRDDLLFDADILLR
IsEEC03681.1     CSGRHPFAFVFPFSAGPRNCVGQKFALMELKVTLAKLLRRYQVKSCHQRDLLLLMADMLLR
                  ** .*****:*****:***** **:* .:.*.***.:*****: **:*

contig_69591      TKRPIRIRLQPRHDTX
IsEEC03681.1     TRNPIKFQLTERLAPQ
                  *:.***:.* *

```

**Figure S24.** Multiple sequence alignment (Clustal  $\Omega$ ) of the deduced amino acid sequence for the putative cytochrome p450 (contig 69591) identified exclusively in the Haller's organ spf transcriptome of unfed virgin adult male *Dermacentor variabilis* versus the top BLAST GenBank hit (lowest expect value; Table 4). Asterisks (\*) denote conserved residues, colons (:) indicate conservation between groups of strongly similar properties scoring  $>0.5$  in the Gonnet PAM 250 matrix, and periods (.) indicate conservation between groups of weakly similar properties scoring  $\leq 0.5$  on the Gonnet PAM 250 matrix. The black bar shows the cytochrome p450 domain. The acronym consists of the first letter of genus and species (*Ixodes scapularis*, Is) followed by the GenBank accession number for the protein BLAST hit (EEC03681.1).





```

contig_06898      DFSVSLIVHFLLPGVAKFFRLKFFNPDTLEYFRSLCQRVIKGRIDTKIRQDDFLQHMIDC
IsEEEC19065.1    -----METRRKTKTKQDDFLQIMIDA
                  *: * .** :***** ***.

contig_06898      QOQTYSGDTSKEVADTEERIFDVDSKLADTEDVPSNALSEEEAMAQCFMFLIAGQGTST
IsEEEC19065.1    QERNRTL DVSQGG EEDAVKLF DIDSKLTDEAPLSSKTLSEEEALSQCMMFILAGHGTSS
                  *: . : *.*: : :*:*:*:*: * :*:*:*:*:*:*:*:*:*:*:*:*:*:*:*:*:*:*:

contig_06898      LVAFTLYMLALNPDVQEKLR EEV D LCVKNHGEYPAMEVVAKLEYLHGVI SEMLRMFPPAS
IsEEEC19065.1    VIAFSLYLLALNPEAQNKLR EVDV CVKENGPKPSMDAIDKLQYLHG VVSEALRIFPPAS
                  :*:*:*:*:*:*:*:*:*:*:*:*:*:*:*:*. * :*:*:*:*:*:*:*:*:*:*:*:*:*:*:

contig_06898      RLERETTQDYVLGDTGIKIPKGCVIAVPLYAMHHDPEYFPDPYVFRPERFMGENAANIRP
IsEEEC19065.1    RLERETTEDYVLGNTGIKVPKGCVVAVPVWALHHD PQYFPDPHSFKPERFSKENVDSIPP
                  *****:*****:*****:*****:*****:*****:*****: *:*:* * * . * *

contig_06898      YTYLPGAGPRNCVGMRLGLHAAKMAVLHAVRIAQFVRTDKTKVPLEFFKGF GVISSDI
IsEEEC19065.1    YVYLPFGAGPRNCIGVRLGLRAVKMALFHSICNVEFVRTAKTKVPLEL FKGFGVISSDI
                  *.*****:*****:*.*****:*: : .:***** *****:*****

contig_06898      TVGVRKRAATSK*NIHIDLKAI*TPTPLLIYLDFFA**FRKVTSDFHSEDNTMTLTESAV
IsEEEC19065.1    TVGVRKRTS-----
                  *****:

```

**Figure S26.** Multiple sequence alignment (Clustal  $\Omega$ ) of the deduced amino acid sequence for the putative cytochrome p450 (contig 6898) identified exclusively in the Haller's organ spf transcriptome of unfed virgin adult male *Dermacentor variabilis* versus the top BLAST GenBank hit (lowest expect value; Table 4). Asterisks (\*) denote conserved residues, colons (:) indicate conservation between groups of strongly similar properties scoring >0.5 in the Gonnet PAM 250 matrix, and periods (.) indicate conservation between groups of weakly similar properties scoring  $\leq$ 0.5 on the Gonnet PAM 250 matrix. The black bar shows the cytochrome p450 domain. The acronym consists of the first letter of genus and species (*Ixodes scapularis*, Is) followed by the GenBank accession number for the protein BLAST hit (EEC19065.1).

```

contig_14383      -----ARTNIQRGDASSLALYKAARKSVGQFGGSKLFFLNLLPPSRLHLKIIFAVQSIF
AtJAC34536.1     LQFFAGALTDVQRNDAAVALSEAARQSVGQFGGAVLFLNLLPDSPLLHKTLLGVRSLF
                  * *::** **:::** :***:*****: **:* ** * ** * :.:*:*:*
                  _____
contig_14383      TQLPSDEVIERMLPIINHRRENPDPTKEDLLQLLLNSEKEDRKNNGKIEGLESSIMMSH
AtJAC34536.1     TQLPSDEMMDRMTPIINHRREHPDPTKEDVLQLLLNSEQEELSSNGKAEGRQLSSTMMSH
                  *****:.:** *****.*****:*****:*.:.*** ** : ** ****
                  _____
contig_14383      PLELRTASNTAICVIAGMDNIASPLAFASYLLSEHQEVQDKVRAEVQALLKKEGELTYDG
AtJAC34536.1     PLTLRTASNTCIFVIASIDAVASPLAFTSYLLSEHPDIQEKVRTEVQAILKKEGKFTYEN
                  ** *****.* ** .:* :*****:***** :*:***:***:*****:***:
                  _____
contig_14383      LGELTYLGQVLSETLRLYPALPGWVPRVCDDEDYEYNGVRILKGMSSVSLPLDVHYDPVLW
AtJAC34536.1     IMELTYLGQVLSESLRLYPSLPGSIRRICDEDYEHNGVRILKGMNVSPTLDLHYDPELW
                  : *****:*****:*** :*:*****:*****.*** **:*** **
                  _____
contig_14383      PEPKFDPERFSKANKDRIHPFSYFPYGIGPRTCMTLLSRVEFLVTLVSLVMRYRLPS
AtJAC34536.1     PQPKFDPERFSKANKDNIRPMSYFPFGFGPRRCIASALSQMELTLVLAAMLVARYRILPS
                  *:*****.***:***:*** *:*: **:*: :.:** ***:***
                  _____
contig_14383      GKYNPEPKYFTAALAGFPKEGVFVKLQKLQNP*KHL*QSEHVMVITDYFFHVYNNNCF
AtJAC34536.1     GRYKEPPAYASSLLGFPKHGIWVKLEK-----
                  *:*:* ** * :.:* ***.*:***:**

```

**Figure S27.** Multiple sequence alignment (Clustal  $\Omega$ ) of the deduced amino acid sequence for the putative cytochrome p450 (contig 14383) identified exclusively in the Haller's organ spf transcriptome of unfed virgin adult male *Dermacentor variabilis* versus the top BLAST GenBank hit (lowest expect value; Table 4). Asterisks (\*) denote conserved residues, colons (:) indicate conservation between groups of strongly similar properties scoring >0.5 in the Gonnet PAM 250 matrix, and periods (.) indicate conservation between groups of weakly similar properties scoring  $\leq 0.5$  on the Gonnet PAM 250 matrix. The black bar shows the cytochrome p450 domain. The acronym consists of the first letter of genus and species (*Amblyomma triste*, At) followed by the GenBank accession number for the protein BLAST hit (JAC34536.1).

```

contig_12057      PAVAARAGGPGLNDAPSSALLATATTRQTRNQQSLSRGLSFSVSGSQKAASSSAITMPV
AtJAC32978.1     -----MPI
                  **;

contig_12057      VLYNLVGSPPCGFIRCLAKHIGVELNLNLDFAKGEHRTEQFLKVNPFHKVPAIDDDGFI
AtJAC32978.1     VLYNLNGSPPCGFIRSLAKEIGVELSVKTLDFAKKEHLSDFLKVNPFHKVPTIDDDGFI
                  ***** .*****.*****.:.***** ** :*:*****:*****

contig_12057      VYESNAIAYLLRKYSPESDLYPACIETRTRIDQVLAASSNIHPQLGAFRFRYFQSTK
AtJAC32978.1     VYESNAIAYLLRKYAPESDLYPNCLRGRTRIDQVLAASSNIQASLGAFRFRFFQHTK
                  *****:***** *: . *****: .*****: ** **

contig_12057      PSAEVKAFFENVVKNLENLIGDSKFAVGDKLTAADFCLIGHVTVCLEFFPCVDKAKYPKL
AtJAC32978.1     PTDEEVSAFEQNVCKGLENLIGDKKFAVGDKITLADLCLIGHVTLVIEFGYVDKAKYPKL
                  *: ***.***:** * *****.*****:* **:*****: :** *****

contig_12057      TAYYELVRNTLPYYQEIFGPFTAQTKQLWDRLK*PLFAPLPQRN*D*ARREMGAVGVLK*
AtJAC32978.1     SGYYELVKSELPHYFDEVYGPAVSALKEALAKL-----
                  :.*****:. *****:*.** .: * : **

```

**Figure S28.** Multiple sequence alignment (Clustal Ω) of the deduced amino acid sequence for the putative glutathione S-transferase (contig 12057) identified exclusively in the Haller’s organ spf transcriptome of unfed virgin adult male *Dermacentor variabilis* versus the top BLAST GenBank hit (lowest expect value; Table 4). Asterisks (\*) denote conserved residues, colons (:) indicate conservation between groups of strongly similar properties scoring >0.5 in the Gonnet PAM 250 matrix, and periods (.) indicate conservation between groups of weakly similar properties scoring ≤0.5 on the Gonnet PAM 250 matrix. The solid black bar shows the glutathione S-transferase amino terminal domain, and the dashed black bar shows the glutathione S-transferase carboxyl terminal domain. The acronym consists of the first letter of genus and species (*Amblyomma triste*, At) followed by the GenBank accession number for the protein BLAST hit (JAC32911.1).

```

contig_04931      AARSGPGMPRRPVVGYWNVRLGQYIRNLLVYKGVAFEDKLYRFGPPPDFDRSHWHGEKF
AtJAC32978.1     -----MPPRPVVGWYVNRALGQHIRNLLIYKGVAFEDKLYRFGPAPDFDRSHWLGEKF
                  *****.*:*:*****:***** ***** **

contig_04931      SLGLQFPNLPYYIDGDVKITQSLAIMRYLARKHDLGARNDEETLQLDFLEQQARDLAWGL
AtJAC32978.1     SLGLQFPNLPYYIDGDVKITQSLAILRYLARKHDLAARNEQEMLQMDLLEQQAKDLAWGL
                  *****:*****.*:*:* **:*:*****:*****

contig_04931      AMTAFNPTTFDEARKKYEENLVNVLKPWANHMRDCTWALGDRLTYVDFLLYEALDWNHEFN
AtJAC32978.1     AMTAFNPTTFDEARKKYEENLVTVLKPWSDLMRDRVWVLGDRLTYVDFLLYEALDWNHEFN
                  *****.*:*:* **.*.*****

contig_04931      ADAFAGYPELQOYLMRFEELPNIKEYFASENYSKWPILGPMVKWGHFKE*LRDFAS*YRP
AtJAC32978.1     PDAFSGYPVLLLEYLRRFEELPNIKEYFASENYSKWPILGPMVKWGHFKE-----
                  ***:* ** * :** *****.*:*****

```

**Figure S29.** Multiple sequence alignment (Clustal  $\Omega$ ) of the deduced amino acid sequence for the putative glutathione S-transferase (contig 4931) identified exclusively in the Haller's organ spf transcriptome of unfed virgin adult male *Dermacentor variabilis* versus the top BLAST GenBank hit (lowest expect value; Table 4). Asterisks (\*) denote conserved residues, colons (:) indicate conservation between groups of strongly similar properties scoring  $>0.5$  in the Gonnet PAM 250 matrix, and periods (.) indicate conservation between groups of weakly similar properties scoring  $\leq 0.5$  on the Gonnet PAM 250 matrix. The solid black bar shows the glutathione S-transferase amino terminal domain, and the dashed black bar shows the glutathione S-transferase carboxyl terminal domain. The acronym consists of the first letter of genus and species (*Amblyomma triste*, At) followed by the GenBank accession number for the protein BLAST hit (JAC32978.1).

```

contig_83534      -----GCLSTGSHYNPNKNHGAPNAEDRHVGDLDGNIVADC-GIA
RpJAA58838.1    TGLQPGAHLHVHSYGDLTNGCNSTKGFNPMHKDHGGPEDRERHVGDLDGNIAEADGKA
                  ** ** .*:** .*:**.*: .:***** *:. * *

contig_83534      VVNLTDHLLTLNGENSIIGRAVVVHADEDDLGLGSHNDSKTTGHAGSRLTCCVIGIARNS
RpJAA58838.1    RVYITDSMISLVGHHNIIGRAMVVHANPDDLKGGTNESKTTGSAGPRLACCVIGFVSGS
                  * :** :::* *...*****:****: **** *. *:***** ** **:*****:. *

```

**Figure S30.** Multiple sequence alignment (Clustal Ω) of the deduced amino acid sequence for the putative superoxide dismutase (contig 83534) identified exclusively in the Haller’s organ spf transcriptome of unfed virgin adult male *Dermacentor variabilis* versus the top BLAST GenBank hit (lowest expect value; Table 4). Asterisks (\*) denote conserved residues, colons (:) indicate conservation between groups of strongly similar properties scoring >0.5 in the Gonnet PAM 250 matrix, and periods (.) indicate conservation between groups of weakly similar properties scoring ≤0.5 on the Gonnet PAM 250 matrix. The black bar shows the copper/zinc superoxide dismutase domain. The acronym consists of the first letter of genus and species (*Rhipicephalus pulchellus*, Rp) followed by the GenBank accession number for the protein BLAST hit (JAA58838.1).
